# Supplementary material for: Prenatal delta-9-tetrahydrocannabinol exposure alters fetal neurodevelopment in rhesus macaques
Source: Springer Nature journal article supplement (doi:10.1038/s41598-024-56386-7), 2024-03-09

**Supplemental Figure 3.** IPA of mir-448 and 199a-3p with associated **A.** pathways and **B.** diseases and functions. P-value cut-off is set to  $p=0.05$  (yellow line).

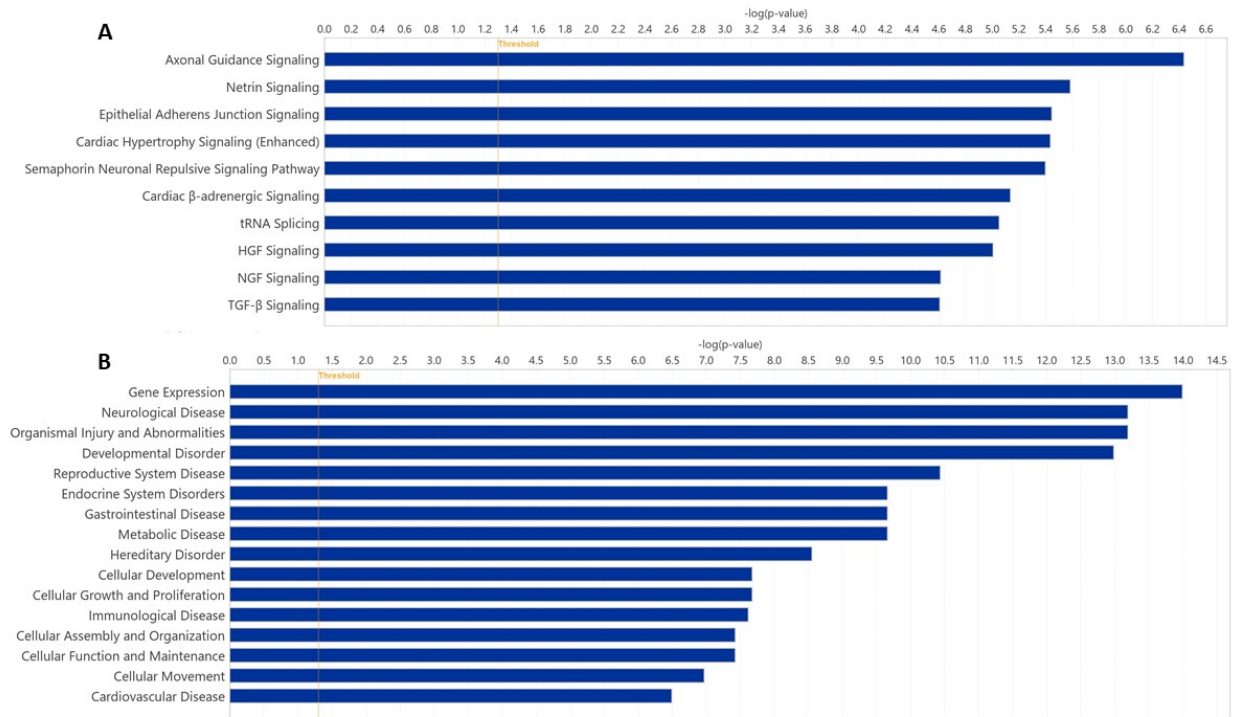

Supplement: MOESM3 [file 41598_2024_56386_MOESM3_ESM.pdf]
