# Supplementary material for: Prenatal delta-9-tetrahydrocannabinol exposure alters fetal neurodevelopment in rhesus macaques
Source: Springer Nature journal article supplement (doi:10.1038/s41598-024-56386-7), 2024-03-09

**Supplemental Figure 4.** The figures shows the inclusion of mir-100-5p, let-7b-5p and mir-424-5p with the 2 miRNAs that were significant (mir-448 and mir-199) resulted in a slight alteration of the listed pathways but for the most part the disease and functions remained consistent with the previous findings. The addition of autophagy, senescence and HGF signaling may offer insights into other areas of organismal development disfunction and/or abnormalities.

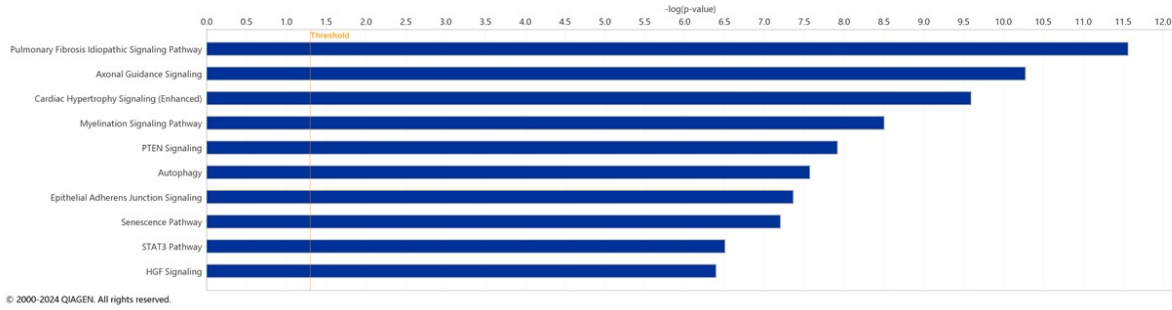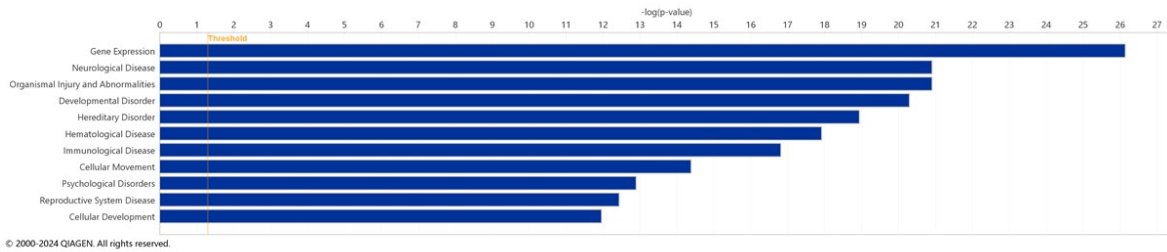

Supplement: MOESM4 [file 41598_2024_56386_MOESM4_ESM.pdf]
