# Supplementary material for: Prenatal delta-9-tetrahydrocannabinol exposure alters fetal neurodevelopment in rhesus macaques
Source: Sci Rep. 2024 Mar 9;14:5808. doi: 10.1038/s41598-024-56386-7 (PMC10924959; doi:10.1038/s41598-024-56386-7)
Supplement: Supplementary file 5 — Supplementary Information 5. [file 41598_2024_56386_MOESM5_ESM.xlsx]

## Sheet: Sheet1
Supplemental Table 1. Summary of pathology findings
Fetal ID	CON-1	CON-2	CON-3	CON-4	CON-5	THC-1	THC-2	THC-3	THC-4	THC-5
GD of Delivery	G154	G154	G155	G154	G154	G153	G153	G153	G156	G156
Placental Pathology			Monodiscoid; mild circumvallate morphology			Monodiscoidal placenta with minor subchorionic edema focally	Placenta appears normal; primary disc weighs approximately twice that of secondary disc	Secondary disc is markedly reduced in size, with multifocal pale tan friable foci
Fetal Gross Pathology	Sex: F Total weight: 514.78g	Sex: M Total weight: 443.58g	Sex: F Total weight: 373.39g	Sex: M Total weight: 568.74g	Sex: F Total weight: 521.04g	Sex: F Total weight: 402.15g Adrenal glands are small for age.	Sex: F Total weight: 540.41g	Sex: M Total weight: 513.81g	Sex: M Total weight: 485.75g Generalized cyanosis	Sex: M Total weight: 376.43g
Nervous System	Brain (52.73 g)	Brain (54.64 g)	Brain (51.19 g)	Brain (57.24 g)	Brain (50.61 g)	Brain (52.47 g)	Brain (57.3 g)	Brain (50.44 g)	Brain (53.14 g)	Brain (49.85 g)
Cardiopulmonary System	Heart (3.41 g) Lungs (9.23 g) - Conducting airways, respiratory airways, and alveoli: Basophilic, fibrillar material (meconium) and low to moderate numbers of anuclear and anucleated squames and abundant debris, multifocal, minimal to moderate, with few foamy alveolar macrophages, and scant hemorrhage and edema in widely scattered alveoli. (X) Intrapulmonary muscular arteries: Fibromyxomatous cha…	Heart (2.68 g) Lungs (8.24 g) - Conducting airways, respiratory airways, and alveoli: Basophilic, fibrillar material (meconium) and low to moderate numbers of anuclear and nucleated squames and abundant debris, multifocal, minimal to moderate, with few vacuolated alveolar macrophages, variable edema, and minimal hemorrhage.	Heart (2.14 g) Lungs (6.68 g) - Conducting and respiratory airways and alveoli, basophilic, fibrillar material (meconium), multifocal, scattered, minimal, with scant debris and low numbers of anuclear and nucleated squames.	Heart (3.05 g) Lungs (14.05 g)- Respiratory airways and alveoli: Basophilic, fibrillar material (meconium), multifocal, mild with cellular debris, low numbers of anuclear and nucleated squames and rare extravasated erythrocytes.	Heart (2.93 g) Trachea - Epithelium, denuded, acute, segmental, multifocal, minimal with degeneration of the epithelial cells. Lungs (9.12 g) - Respiratory airways and alveoli, basophilic, fibrillar material (meconium), multifocal, scattered, minimal with variable low numbers of anuclear and nucleated squames.	Heart (1.72 g) Lungs (7.50 g) - Conducting airways, respiratory airways and alveoli: Basophilic, fibrillar material (meconium) and low to moderate numbers of anuclear and nucleated squames and abundant debris, multifocal, mild to moderate, with low numbers of vacuolated alveolar macrophages, rare neutrophils, mild to moderate edema, and minimal hemorrhage. (X) Intrapulmonary muscular arteries: Fi…	Heart (3.24 g) Lungs (14.18 g) - Conducting airways, respiratory airways and alveoli: basophilic, fibrillar material (meconium), multifocal, mild, with low numbers of anuclear and nucleated squames, rare multinucleated cells and high numbers of extravasated erythrocytes.	Heart (2.61 g) Lungs (7.42 g)- Low numbers of anuclear and nucleated squames, multifocally and minimal, scattered cellular debris.	Heart (2.48 g) Lungs (10.10 g)- Respiratory airways and alveoli: Basophilic, fibrillar material (meconium), multifocal, minimal to mild with cellular debris, few multinucleated giant cells, low numbers of anuclear and nucleated squames and rare extravasated erythrocytes.	Heart (1.84 g) Lungs (6.27 g)- Congestion, acute, diffuse, mild with low numbers of anuclear and nucleated squames and moderate numbers of extravasated erythrocytes.
Lymphatic System	Thymus (2.34 g) Spleen (0.78 g)	Thymus (1.74 g) - Depletion, thymic lymphocytes, multifocal, minimal. Spleen (0.47 g) Tracheobronchial lymph node - In slide labeled lung: Hemorrhage, subcapsular and medullary sinuses, acute, diffuse, mild.	Thymus (1.29 g) Spleen (0.68 g)	Thymus (1.53 g) Spleen (0.94 g)	Thymus (1.71 g) Spleen (0.8 g)	Thymus (1.56 g) - Depletion, thymic lymphocytes, multifocal, widely scattered, minimal. Spleen (0.67 g)	Thymus (1.68 g) Spleen (0.87 g)	Thymus (1.23 g) Spleen (0.26 g) - White pulp, decreased, multifocal, minimal. Ectopic pancreatic tissue, acini and ducts, multifocal, mild.	Thymus (1.86 g) Spleen (0.6 g) Ileocolic lymph node - Medullary sinus, macrophages laden with golden brown pigment, diffuse, mild.	Thymus (0.94 g) Spleen (0.47 g) - White pulp, decreased, multifocal, minimal. Tracheobronchial lymph node - Sinus erythrophagocytosis, acute, multifocal, mild.
Gastrointestinal System	Liver (14.46 g) Pancreas (0.36 g)	Liver (11.32 g) Pancreas (0.39 g)	Liver (8.55 g)- Degeneration, hydropic, hepatocellular, multifocal, scattered, minimal. Pancreas (0.23 g)	Liver (12.69 g) - Necrosis, hepatocellular, single cell, multifocal, widely scattered, rare. Pancreas (0.41 g)	Liver (12.97 g) Pancreas (0.35 g)	Liver (14.1 g) Pancreas (0.23 g)	Liver (14.95 g) Pancreas (0.54 g) Omentum - Congestion, diffuse, moderate, with multifocal hemorrhage.	Liver (12.89 g) Pancreas (0.62 g)	Liver (9.88 g) Pancreas (0.26 g)	Liver (9.78 g) - Degeneration, hepatocellular, multifocal, mild with hydropic change, round, eosinophilic condensation of hepatocyte cytoplasm, microvesicular lipid vacuolation, occasional single cell necrosis and moderate acute hemorrhage and congestion. Pancreas (0.30 g)
Urinary System	Kidneys (2.59 g) Urinary bladder - Muscular arteries, fibromyxomatous change, tunica intima and tunica media, segmental, multifocal, minimal.	Kidneys (2.09 g) - Degeneration, renal tubules, multifocal, minimal, with increased cytoplasmic bile pigment.	Kidneys (2.25 g) - Degeneration and necrosis, renal tubules, multifocal, minimal to mild.	Kidneys (2.15 g) - Degeneration and necrosis, renal tubules, multifocal, minimal. Proximal renal tubule, cytoplasm, pigment, golden brown, multifocal, minimal.	Kidneys (1.64 g) - Degeneration and necrosis, renal tubules, multifocal, minimal to mild.	Kidneys (weight not measured)	Kidneys (2.29 g) - Degeneration and necrosis, renal tubules, multifocal, minimal, with few granular casts.	Kidneys (2.22 g) - Congestion, medulla, peritubular capillaries, multifocally extensive, mild. Degeneration and necrosis, renal tubules, multifocal, minimal.	Kidneys (2.35 g) - Degeneration and necrosis, renal tubules, multifocally extensive, mild.	Kidneys (1.84 g) - Degeneration and necrosis, renal tubules, multifocal, minimal to mild. Congestion, medulla, peritubular capillaries, diffuse, mild. Proximal renal tubule, cytoplasm, pigment, golden brown, multifocal, minimal.
Reproductive System	Ovaries (0.079 g) Mesosalpinx - Embryonic ductal rests, urogenital, multiple.	Testes (0.140 g)	Ovaries (0.085 g)	Testes (0.12 g) Seminal vesicles - Apoptosis, epithelial cells, multifocal, low numbers.	Ovaries (0.087 g) Mesosalpinx - Embryonic ductal rests, urogenital, multiple.	Ovaries (0.14 g) Mesovarium - Embryonic ductal rests, urogenital, multiple.	Ovaries (0.031 g) Mesosalpinx - Embryonic ductal rests, urogenital, multiple. Vagina - Lymphocytic infiltrates, lamina propria, multifocal, minimal.	Testes (0.08 g)	Testes (0.08 g) Seminal vesicles - Apoptosis, epithelial cells, multifocal, few.	Testes (0.02 g)- Hemorrhage, acute, multifocal, mild.
Endocrine System	Thyroid gland (0.48 g) - Thymic tissue, ectopic, focal, moderate with minimal, multifocal depletion of thymic lymphocytes. Adrenal glands (0.27 g) Pituitary gland (0.015 g)	Thyroid gland (0.33 g) Adrenal glands (0.30 g) - Left: accessory cortical nodules, intracapsular, two. Pituitary gland (0.016 g)	Thyroid gland (not measured) Adrenal glands (0.21 g) Pituitary gland (0.014 g)	Thyroid gland (0.23 g) Adrenal glands (0.23 g) Pituitary gland (0.02 g)	Thyroid gland (0.35 g) Adrenal glands (0.29 g) Pituitary gland (0.014 g)	Thyroid gland (0.22 g) Adrenal glands (0.10 g) Pituitary gland (0.01 g)	Thyroid gland (0.31 g) Adrenal glands (0.39 g) - Degeneration, adrenal cortical cells, multifocal, minimal to mild. Pituitary gland (0.02 g)	Thyroid gland (0.12 g) Adrenal glands (0.34 g) Pituitary gland (0.03 g)	Thyroid gland (not measured) Adrenal glands (0.23 g) Pituitary gland (0.014 g)	Thyroid gland (0.13 g) Adrenal glands (0.41 g) - Hemorrhage, acute, multifocal, minimal. Pituitary gland (0.014 g)
